# Supplementary material for: Functional Characterization of Schizophrenia-Associated Variation in CACNA1C
Source: PubMed Central journal article supplement (PMC4898738; doi:10.1371/journal.pone.0157086), 2016-06-08

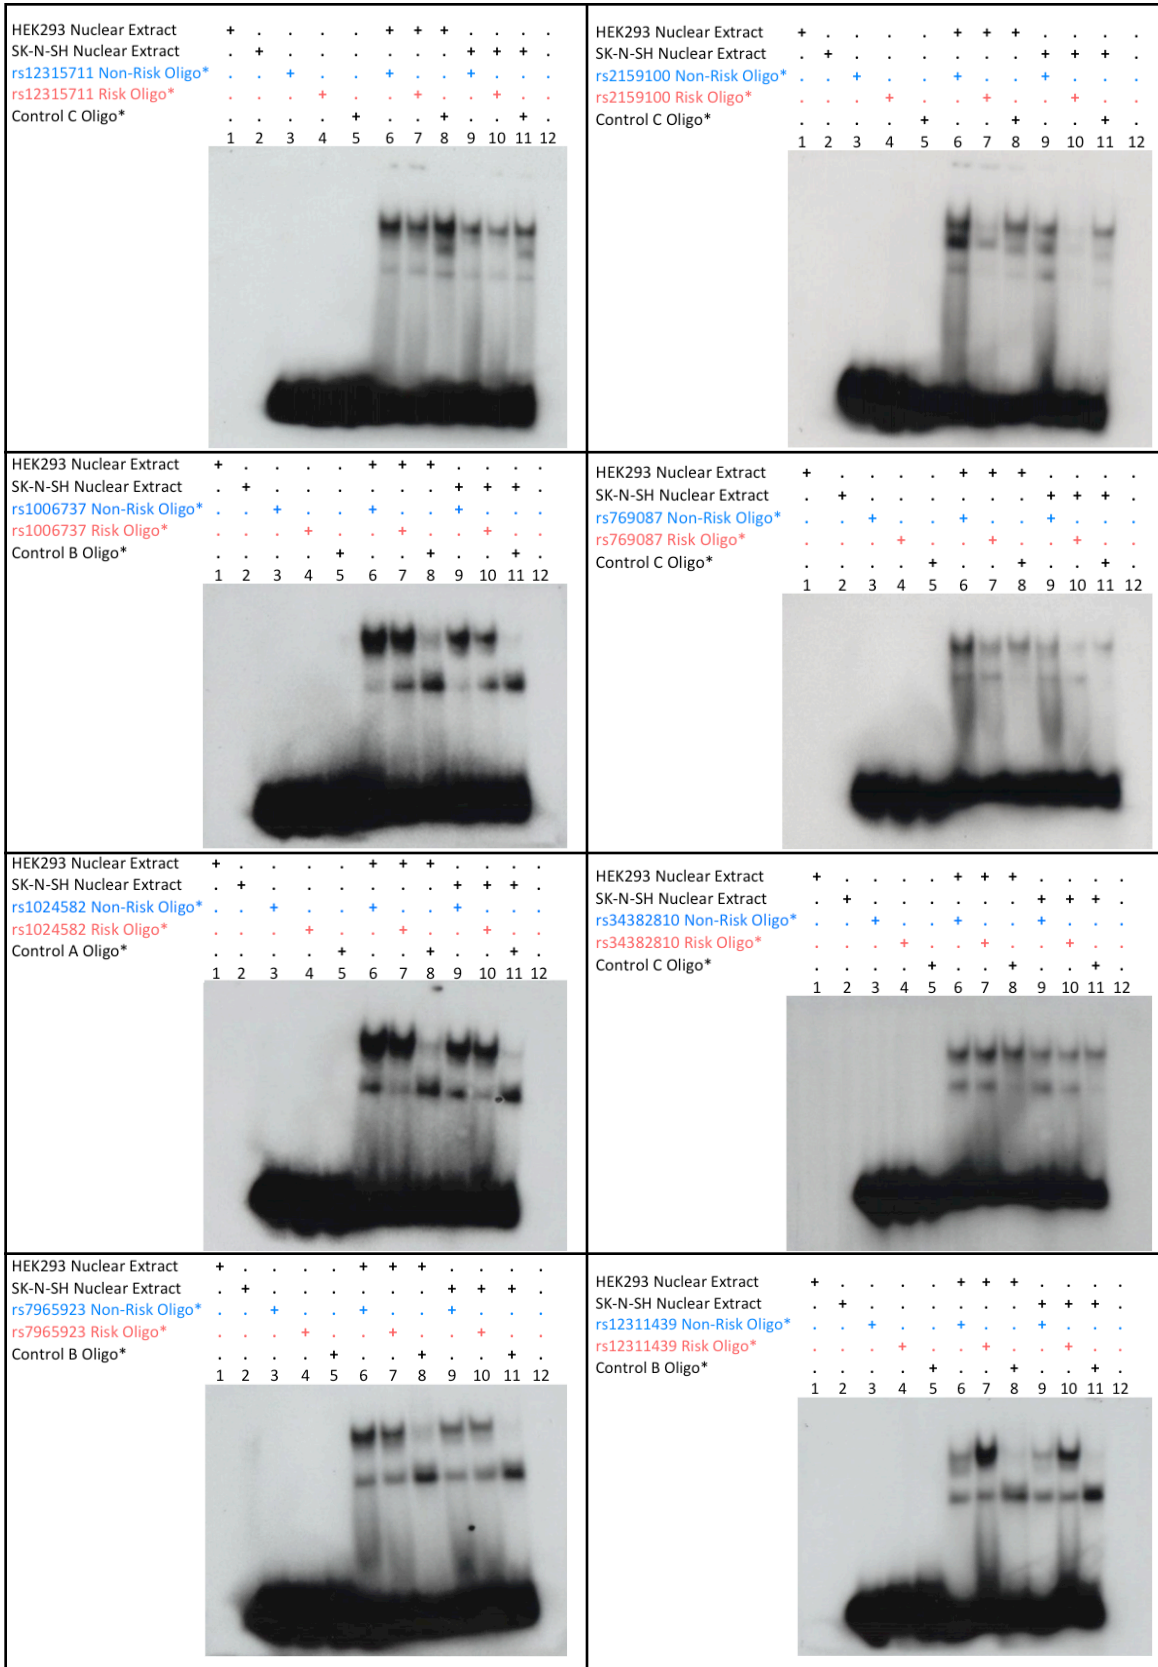

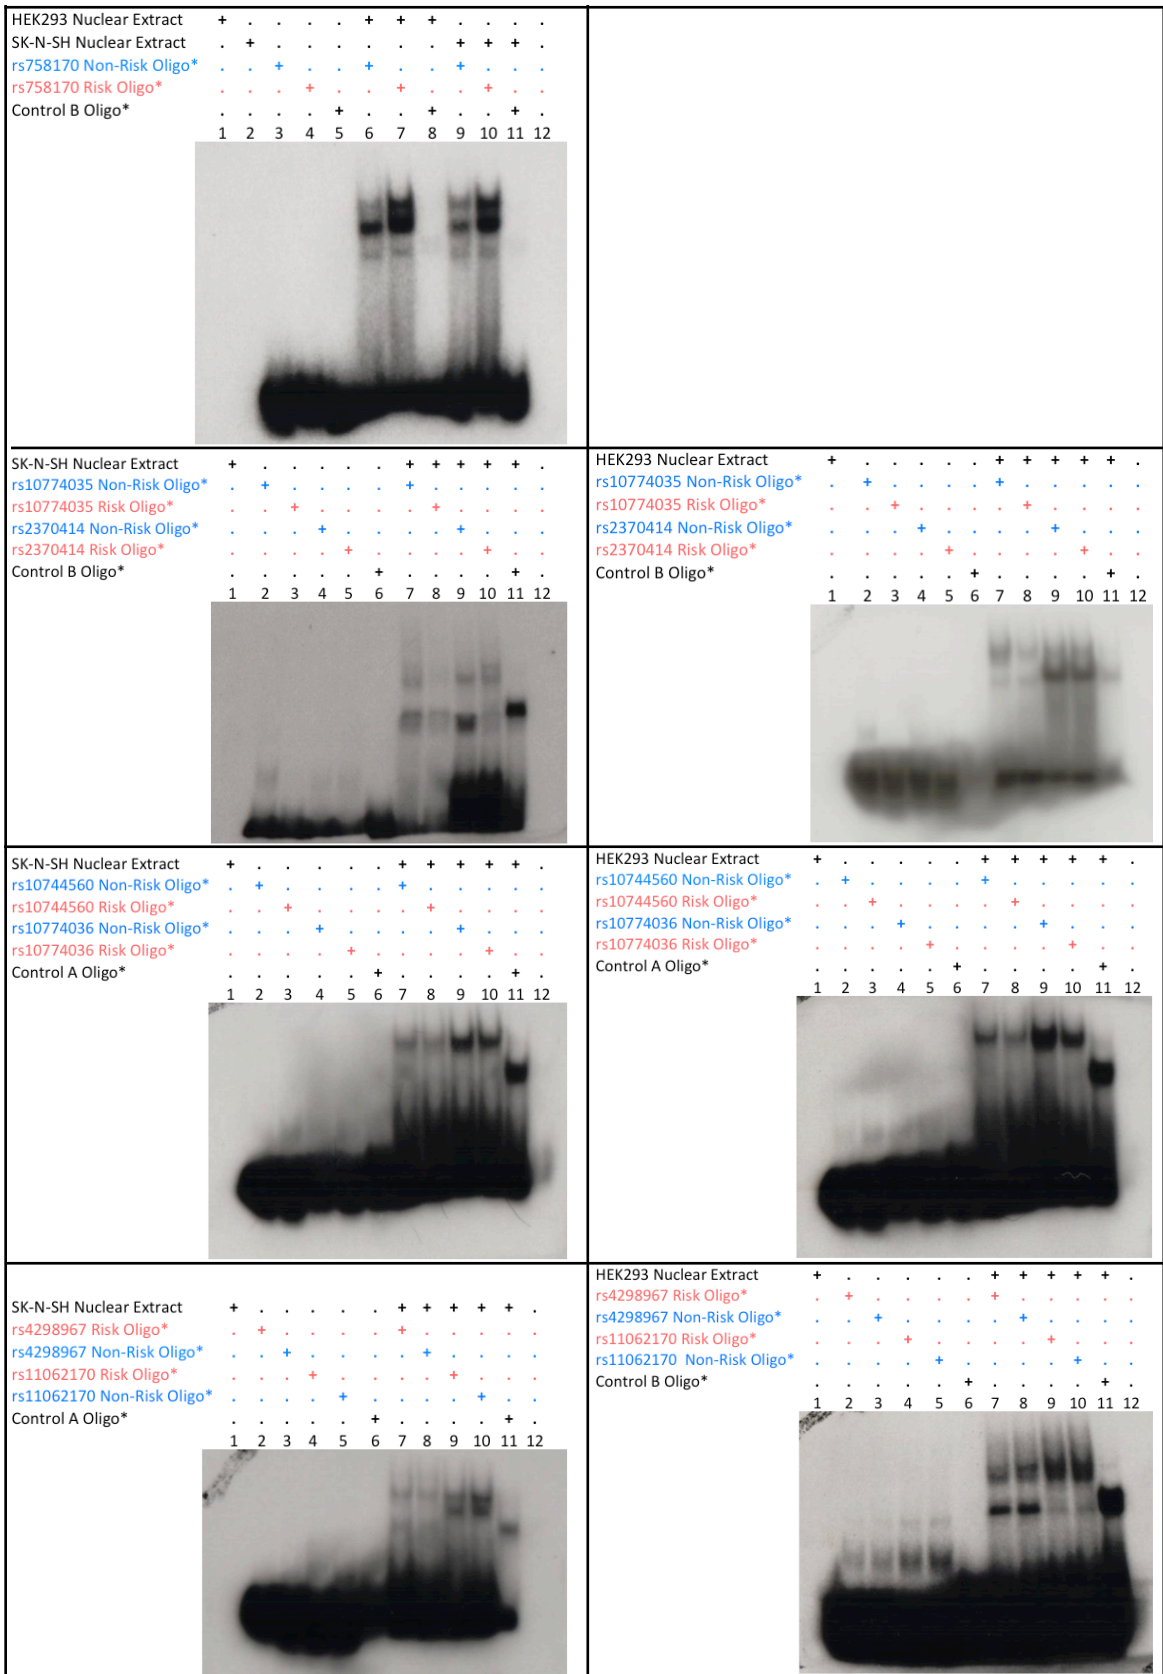

Supplement: pone.0157086.s004.pdf [file pone.0157086.s004.pdf]
